# Supplementary material for: Association Between Antimicrobial Stewardship Programs and Antibiotic Use Globally: A Systematic Review and Meta-Analysis
Source: PubMed Central journal article supplement (PMC9912134; doi:10.1001/jamanetworkopen.2022.53806), 2023-02-09
Supplement: jamanetwopen-e2253806-s001.pdf [file jamanetwopen-e2253806-s001.pdf]

## Supplemental Online Content

Zay Ya K, Win PTN, Bielicki J, Lambiris M, Fink G. Association between antimicrobial stewardship programs and antibiotic use globally: a systematic review and meta-analysis. *JAMA Netw Open*. 2023;6(2):e2253806. doi:10.1001/jamanetworkopen.2022.53806

**eTable 1.** Search String for the Systematic Review and Meta-analysis

**eTable 2.** Inclusion and Exclusion Criteria for Article Screening

**eTable 3.** Quality Assessment of the 57 Studies Using the Effective Public Health Practice Project Quality Assessment Tool

**eTable 4.** Characteristic of Included Studies in the Systematic Review and Meta-analysis

**eTable 5.** Summary of ASP Components Identified in the Included Studies

**eFigure 1.** Change in Total Antibiotic Consumption after ASPs (DDD or DOT per 100 Patient-Days)

**eFigure 2.** Subgroup Analyses (Antibiotic Prescriptions)

**eFigure 3.** Subgroup Analyses (Consumption in DDD per 100 Patient-Days)

**eFigure 4.** Meta-analysis Summary (Antibiotic Consumption in DDD per 100 Patient-Days)

This supplemental material has been provided by the authors to give readers additional information about their work.

eTable 1. Search String for the Systematic Review and Meta-analysis

**Keywords in combination**

"drug resistance, microbial"[MeSH Terms] OR Antibiotic resistance OR Antimicrobial Resistance OR Microbial Drug Resistance OR Antimicrobial Drug Resistance OR Multiple Drug Resistance OR Antibiotic Use OR Antibiotic Prescription OR Antibiotic Consumption

AND

Politic\* OR Intervention\*

AND

Impact\* OR Evaluate\* OR Assess\* OR Effect\*

eTable 2. Inclusion and Exclusion Criteria for Article Screening

|                                                                                                                                                                                                                                                                                                                                                    |
|----------------------------------------------------------------------------------------------------------------------------------------------------------------------------------------------------------------------------------------------------------------------------------------------------------------------------------------------------|
| <p>Inclusion criteria</p> <ul style="list-style-type: none"><li>➤ Studies in humans</li><li>➤ Reports on policy and interventions designed to reduce antibiotic use or antimicrobial resistance</li><li>➤ Primary studies</li><li>➤ Full text availability</li><li>➤ Report in English</li><li>➤ Studies within 1 Aug 2010 to 1 Aug 2020</li></ul> |
| <p>Exclusion criteria</p> <ul style="list-style-type: none"><li>➤ Studies in animals</li><li>➤ Reports not relating with AMR policies and interventions</li><li>➤ Review, expert opinions, conference abstracts posters and newspaper articles</li><li>➤ Report in other language</li><li>➤ Study before 1 Aug 2010</li></ul>                      |

eTable 3. Quality Assessment of the 57 Studies Using the Effective Public Health Practice Project Quality Assessment Tool

| Author               | Study type                          | Selection bias | Study design | Confounders | Blinding | Data collection methods | Withdrawal and drop-outs | Global rating |
|----------------------|-------------------------------------|----------------|--------------|-------------|----------|-------------------------|--------------------------|---------------|
| Sloane et al         | Controlled trial                    | S              | S            | S           | M        | S                       | S                        | M             |
| Alvarez-Lerma et al  | Prospective interventional cohort   | S              | M            | W           | M        | S                       | M                        | M             |
| Gonzales et al       | RCT                                 | S              | S            | S           | M        | S                       | S                        | S             |
| Cross et al          | Cluster-randomized                  | M              | M            | W           | M        | S                       | M                        | M             |
| Tedeschi et al       | Quasi-experimental                  | M              | M            | W           | M        | S                       | M                        | M             |
| Aldeyab, M. A.       | Retrospective interventional cohort | M              | M            | S           | M        | S                       | M                        | M             |
| Brink et al          | Prospective interventional cohort   | S              | M            | S           | M        | S                       | M                        | S             |
| Fortini et al        | Retrospective interventional cohort | S              | M            | S           | M        | S                       | M                        | S             |
| Rahbarimanes h et al | Quasi-experimental                  | S              | M            | M           | W        | S                       | S                        | M             |
| Pitiriga et al       | Prospective interventional cohort   | M              | M            | W           | M        | S                       | M                        | M             |
| Ruiz et al           | Prospective interventional cohort   | S              | M            | S           | W        | S                       | M                        | M             |
| Elligsen et al       | Controlled trial                    | S              | S            | S           | M        | S                       | S                        | S             |
| Dik, J. W. H et al   | Controlled trial                    | S              | S            | S           | M        | S                       | S                        | S             |
| Sikkens et al        | Prospective interventional cohort   | S              | M            | M           | W        | S                       | M                        | M             |
| Di Pentima et al     | Prospective interventional cohort   | S              | M            | M           | W        | S                       | M                        | M             |
| Strumann et al       | Controlled trial                    | M              | S            | S           | W        | S                       | M                        | M             |
| Wu, C. T et al       | Cohort                              | S              | M            | S           | W        | S                       | S                        | M             |
| Chang et al          | RCT                                 | S              | S            | S           | M        | S                       | S                        | S             |
| Wei, X et al         | RCT                                 | S              | S            | S           | M        | S                       | S                        | S             |
| Gerber, J. S et al   | RCT                                 | S              | S            | S           | M        | S                       | S                        | S             |
| Gong et al           | Prospective interventional cohort   | S              | M            | S           | M        | S                       | M                        | S             |

|                     |                                   |   |   |   |   |   |   |   |
|---------------------|-----------------------------------|---|---|---|---|---|---|---|
| W. van Buul et al   | Controlled trial                  | S | S | S | M | S | M | S |
| Llor, C et al       | Controlled trial                  | S | S | S | M | S | S | S |
| Llor C et al        | Cohort                            | S | M | S | W | W | M | W |
| Little et al        | RCT                               | S | S | S | S | S | S | S |
| McNulty et al       | RCT                               | S | S | S | S | S | S | S |
| March-López et al   | Quasi-experimental                | S | M | S | W | S | M | M |
| Newland et al       | Controlled trial                  | M | S | S | M | M | M | S |
| Craft et al         | Cohort                            | M | M | M | W | M | W | W |
| Khdour et al        | Prospective interventional cohort | M | M | W | M | M | M | M |
| Talpaert et al      | Quasi-experimental                | M | M | W | M | S | M | M |
| Fleet et al         | RCT                               | S | S | S | S | S | M | S |
| Stenehjem et al     | RCT                               | S | S | M | M | S | M | S |
| Ouldali et al       | Quasi-experimental                | M | M | M | M | S | M | S |
| Zhou, Y et al       | Prospective interventional cohort | M | M | M | M | S | W | M |
| Abubakar et al      | Prospective interventional cohort | S | M | M | W | S | M | M |
| Magedanz et al      | Cohort                            | M | M | W | W | M | M | W |
| Singh et al         | Prospective interventional cohort | S | M | M | W | M | M | M |
| Tavares et al       | Prospective interventional cohort | S | M | M | M | M | M | S |
| Borde et al         | Quasi-experimental                | S | M | M | W | M | M | M |
| Nitsch-Osuch et al  | Cohort                            | S | M | W | W | M | M | W |
| Lu, C et al         | Prospective interventional cohort | M | M | M | W | M | M | M |
| Hürlimann et al     | RCT                               | S | S | S | M | S | M | S |
| Le Corvoisier et al | RCT                               | M | S | S | S | S | S | S |
| Jenkins et al       | Quasi-experimental                | S | M | M | M | S | W | M |
| Wei, X. et al       | Cluster randomized                | S | S | S | M | S | S | S |
| Kreitmeyr et al     | Prospective interventional cohort | S | M | S | M | S | S | S |

|                    |                                     |          |          |          |          |          |          |          |
|--------------------|-------------------------------------|----------|----------|----------|----------|----------|----------|----------|
| Butt et al         | Quasi-experimental                  | <b>S</b> | <b>M</b> | <b>S</b> | <b>W</b> | <b>S</b> | <b>S</b> | <b>S</b> |
| Regev-Yochay et al | Cluster randomized                  | <b>S</b> | <b>S</b> | <b>S</b> | <b>M</b> | <b>S</b> | <b>S</b> | <b>S</b> |
| Adhikari et al     | Prospective interventional cohort   | <b>S</b> | <b>M</b> | <b>S</b> | <b>M</b> | <b>S</b> | <b>M</b> | <b>S</b> |
| Onorato et al      | Prospective interventional cohort   | <b>S</b> | <b>M</b> | <b>W</b> | <b>M</b> | <b>S</b> | <b>M</b> | <b>M</b> |
| Al Bahar et al     | Retrospective interventional cohort | <b>S</b> | <b>M</b> | <b>M</b> | <b>M</b> | <b>S</b> | <b>M</b> | <b>S</b> |
| Borde et al        | Quasi-experimental                  | <b>S</b> | <b>S</b> | <b>S</b> | <b>S</b> | <b>S</b> | <b>S</b> | <b>S</b> |
| Pate et al         | Prospective interventional cohort   | <b>S</b> | <b>S</b> | <b>S</b> | <b>S</b> | <b>S</b> | <b>S</b> | <b>S</b> |
| Abdallah et al     | Retrospective interventional cohort | <b>S</b> | <b>S</b> | <b>S</b> | <b>S</b> | <b>S</b> | <b>S</b> | <b>S</b> |
| Sid Ahmed et al    | Prospective interventional cohort   | <b>S</b> | <b>S</b> | <b>S</b> | <b>S</b> | <b>S</b> | <b>S</b> | <b>S</b> |
| Al-Omari et al     | Quasi-experimental                  | <b>S</b> | <b>S</b> | <b>S</b> | <b>S</b> | <b>S</b> | <b>S</b> | <b>S</b> |

In each component, a rating of strong, moderate, weak has to be assigned according to rating guidelines and dictionaries. For global rating of each paper, “Strong” rating was given when there are no weak ratings in all components, “Moderate” for one weak rating and “Weak” for two or weak ratings in one of assessment. Only articles with “Strong” and “Moderate” ratings were included in our analysis. We only included articles with high study quality that had strong or moderate ratings in at least 5 out of the 6 domains.

eTable 4. Characteristic of Included Studies in the Systematic Review and Meta-analysis

| Authors             | Year of publication | Study design                        | Country          | Study settings                                          | Study population                                                                                                                               | Interventions                        | Reduction in antibiotic consumption |
|---------------------|---------------------|-------------------------------------|------------------|---------------------------------------------------------|------------------------------------------------------------------------------------------------------------------------------------------------|--------------------------------------|-------------------------------------|
| Sloane et al        | 2020                | Controlled trial                    | USA              | community Nursing Homes                                 | nursing homes, nursing staff and medical care providers in nursing homes                                                                       | antimicrobial stewardship programmes | Yes                                 |
| Alvarez-Lerma et al | 2018                | Prospective interventional cohort   | Spain            | ICU in Acute-care teaching hospital                     | patients in the ICUs of a 400-bed acute-care teaching hospital                                                                                 | antimicrobial stewardship programmes | Yes                                 |
| Gonzales et al      | 2013                | RCT                                 | USA              | primary care practices                                  | uncomplicated acute bronchitis patients in primary care                                                                                        | electronic decision support          | Yes                                 |
| Tedeschi et al      | 2017                | Quasi-experimental                  | Italy            | rehabilitation hospital                                 | patients with spinal-cord injuries                                                                                                             | antimicrobial stewardship program    | Yes                                 |
| Aldeyab, M. A.      | 2012                | Retrospective interventional cohort | Northern Ireland | one hospital within the Trust                           | patients with <i>Clostridium difficile</i> infection                                                                                           | hospital antibiotic policy           | Yes                                 |
| Brink et al         | 2016                | Prospective interventional cohort   | South Africa     | private hospitals                                       | patients in private hospital                                                                                                                   | antimicrobial stewardship programmes | Yes                                 |
| Fortini et al       | 2018                | Retrospective interventional cohort | Italy            | mid-sized acute care hospital                           | patients Internal Medicine ward                                                                                                                | antimicrobial stewardship programmes | Yes                                 |
| Rahbarimanesh et al | 2019                | Quasi-experimental                  | Iran             | children's hospital                                     | paediatric patients                                                                                                                            | antimicrobial stewardship programmes | Yes                                 |
| Pitiriga et al      | 2018                | Prospective interventional cohort   | Greece           | modern medicine hospital                                | Patients from cardiac surgery, intensive care unit (ICU), orthopaedic surgery, oncology, neurosurgery, urology and acute medical/surgical care | antimicrobial stewardship programmes | No                                  |
| Ruiz et al          | 2018                | Prospective interventional cohort   | Spain            | medical ICU in a tertiary hospital                      | patients in ICU                                                                                                                                | antimicrobial stewardship programmes | Yes                                 |
| Elligsen et al      | 2012                | Controlled trial                    | Canada           | single tertiary care centre with 3 intensive care units | medical and surgical patients as well as regional trauma patients; cardiac and vascular surgery patients; and burn patients                    | antimicrobial stewardship programmes | Yes                                 |
| Dik, J. W. H et al  | 2015                | Controlled trial                    | Netherlands      | university medical centre urology ward                  | patients in urology ward                                                                                                                       | antimicrobial stewardship programmes | Yes                                 |

|                    |      |                                   |                        |                                                            |                                                                                         |                                      |                              |
|--------------------|------|-----------------------------------|------------------------|------------------------------------------------------------|-----------------------------------------------------------------------------------------|--------------------------------------|------------------------------|
| Sikkens et al      | 2017 | Prospective interventional cohort | Netherland             | tertiary care medical centre and general teaching hospital | patients in 7 clinical departments                                                      | training and guidelines              | Yes                          |
| Di Pentima et al   | 2011 | Prospective interventional cohort | USA                    | tertiary care academic paediatric hospital                 | paediatric oncology patients and patients who were receiving stem cell transplantations | antimicrobial stewardship programmes | Yes                          |
| Strumann et al     | 2020 | Controlled trial                  | Germany                | primary care physicians in private practices               | URTI cases                                                                              | training and guidelines              | Yes                          |
| Wu, C. T et al     | 2017 | Cohort                            | Taiwan                 | general hospital                                           | all patients admitted to Nan Men General Hospital                                       | antimicrobial stewardship programmes | Yes                          |
| Chang et al        | 2020 | RCT                               | China                  | primary care institutions                                  | patients in community health service centres                                            | computerized decision support        | Yes                          |
| Wei, X et al       | 2017 | RCT                               | China                  | primary care hospitals                                     | paediatric outpatients                                                                  | antimicrobial stewardship programmes | Yes                          |
| Gerber, J. S et al | 2013 | RCT                               | USA                    | paediatric primary care sites                              | paediatric outpatients                                                                  | antimicrobial stewardship programmes | Yes                          |
| Gong et al         | 2016 | Prospective interventional cohort | China                  | tertiary paediatric hospital                               | paediatric outpatients                                                                  | antimicrobial stewardship programmes | Yes                          |
| W. van Buul et al  | 2015 | Controlled trial                  | Netherland             | nursing homes and residential care facilities              | nursing homes                                                                           | antimicrobial stewardship programmes | No changes in antibiotic use |
| Llor, C et al      | 2011 | Controlled trial                  | Spain                  | primary care centres                                       | all cases of pharyngitis                                                                | antimicrobial stewardship programmes | Yes                          |
| Little et al       | 2013 | RCT                               | Six European countries | primary-care practices                                     | patients with LRTIs                                                                     | internet-based training              | Yes                          |
| McNulty et al      | 2018 | RCT                               | United Kingdom         | GP medical practices                                       | patients in general practices                                                           | training and guidelines              | Yes                          |
| March-López et al  | 2020 | Quasi-experimental                | Spain                  | primary health care                                        | PHC patients                                                                            | antimicrobial stewardship programmes | Yes                          |
| Newland et al      | 2012 | Controlled trial                  | USA                    | tertiary care children's hospital                          | paediatric patients                                                                     | antimicrobial stewardship programmes | Yes                          |
| Khdour et al       | 2018 | Prospective interventional cohort | Northern Ireland       | tertiary hospital including                                | ICU and any antimicrobial drug administered patients                                    | antimicrobial stewardship programmes | Yes                          |
| Talpaert et al     | 2011 | Quasi-experimental                | United Kingdom         | acute general hospital                                     | patients in an acute hospital                                                           | antimicrobial stewardship programmes | Yes                          |



|                     |      |                                   |                |                                                         |                                                                                               |                                              |     |
|---------------------|------|-----------------------------------|----------------|---------------------------------------------------------|-----------------------------------------------------------------------------------------------|----------------------------------------------|-----|
| Fleet et al         | 2014 | RCT                               | United Kingdom | nursing homes                                           | nursing homes                                                                                 | antimicrobial stewardship programmes         | Yes |
| Stenehjem et al     | 2018 | RCT                               | USA            | critical access hospitals with paediatric units and ICU | patients in 15 small hospitals                                                                | antimicrobial stewardship programmes         | No  |
| Ouldali et al       | 2017 | Quasi-experimental                | France         | paediatric patients with ARTI diagnosis                 | ARTI                                                                                          | treatment guidelines                         | Yes |
| Zhou, Y et al       | 2015 | Prospective interventional cohort | China          | department of Urology                                   | patients with clean operation                                                                 | antimicrobial stewardship programmes         | Yes |
| Abubakar et al      | 2019 | Prospective interventional cohort | Nigeria        | obstetrics and gynaecology settings                     | women who had elective and emergency obstetric and gynaecologic surgeries                     | antimicrobial stewardship programmes         | Yes |
| Singh et al         | 2019 | Prospective interventional cohort | India          | academic large hospital                                 | patients in surgical, medical units and critical care                                         | antimicrobial stewardship programmes         | Yes |
| Tavares et al       | 2018 | Prospective interventional cohort | Portugal       | university hospital                                     | patients in tertiary care public teaching hospital                                            | antimicrobial stewardship programmes         | Yes |
| Borde et al         | 2015 | Quasi-experimental                | Germany        | university hospital centre                              | non-trauma emergency patients                                                                 | antimicrobial stewardship programmes         | Yes |
| Lu, C et al         | 2019 | Prospective interventional cohort | China          | neonatal ICU                                            | infants who received antibiotics during their hospital stay                                   | antimicrobial stewardship programmes         | Yes |
| Hürlimann et al     | 2015 | RCT                               | Switzerland    | primary care physicians                                 | upper RTIs, lower RTIs                                                                        | treatment guidelines                         | Yes |
| Le Corvoisier et al | 2013 | RCT                               | France         | GPs with a practice in three counties                   | patients treated by GPs                                                                       | interactive workshop and educational seminar | Yes |
| Jenkins et al       | 2015 | Quasi-experimental                | USA            | public safety net hospital                              | inpatients                                                                                    | antimicrobial stewardship programmes         | Yes |
| Wei, X. et al       | 2019 | Cluster randomized                | China          | primary care facilities in rural counties               | children with URTIs                                                                           | interactive workshop and educational seminar | Yes |
| Kreitmeyr et al     | 2017 | Prospective interventional cohort | Germany        | academic children's hospital                            | paediatric patients                                                                           | antimicrobial stewardship programmes         | Yes |
| Butt et al          | 2019 | Quasi-experimental                | Pakistan       | tertiary care hospital                                  | patients with clean/clean contaminated surgeries from three different surgery wards, general, | pharmacist's educational intervention        | Yes |

|                    |      |                                     |                |                                                              |                                                    |                                      |     |
|--------------------|------|-------------------------------------|----------------|--------------------------------------------------------------|----------------------------------------------------|--------------------------------------|-----|
|                    |      |                                     |                |                                                              | orthopaedic and gynaecology                        |                                      |     |
| Regev-Yochay et al | 2011 | Cluster randomized                  | Israel         | primary care paediatric solo practices                       | children in a community setting                    | antimicrobial stewardship programmes | Yes |
| Adhikari et al     | 2018 | Prospective interventional cohort   | Australia      | medical-surgical tertiary Australian adult ICU               | patients in tertiary referral hospital level-6 ICU | antimicrobial stewardship programmes | Yes |
| Onorato et al      | 2020 | Prospective interventional cohort   | Italy          | ICUs of an acute-care teaching hospital.                     | patients in ICU                                    | antimicrobial stewardship programmes | Yes |
| Al Bahar et al     | 2020 | Retrospective interventional cohort | United Kingdom | teaching hospital                                            | patients in a tertiary care hospital               | computerised decision support        | Yes |
| Borde et al        | 2014 | Quasi-experimental                  | Germany        | academic teaching hospital and tertiary care referral centre | patients in a tertiary care hospital               | antimicrobial stewardship programmes | Yes |
| Pate               | 2012 | Prospective interventional cohort   | USA            | long-term acute care hospital                                | patients in long-term acute care hospital          | antimicrobial stewardship programmes | Yes |
| Abdallah           | 2017 | Retrospective interventional cohort | Saudi Arabia   | tertiary care centre particularly spinal and neurosurgery    | patients in adult ICU                              | antimicrobial stewardship programmes | Yes |
| Sid Ahmed          | 2020 | Prospective interventional cohort   | Qatar          | acute care hospital                                          | patient in an acute care hospital                  | antimicrobial stewardship programmes | Yes |
| Al-Omari           | 2020 | Quasi-experimental                  | Saudi Arabia   | tertiary private hospitals                                   | adult inpatients                                   | antimicrobial stewardship programmes | Yes |

eTable 5. Summary of ASP Components Identified in the Included Studies

| ASP component                    | component description                                                                                                                                                                                                                                                                                                                                                                                                                                                                                                                                                                                                                                                  |
|----------------------------------|------------------------------------------------------------------------------------------------------------------------------------------------------------------------------------------------------------------------------------------------------------------------------------------------------------------------------------------------------------------------------------------------------------------------------------------------------------------------------------------------------------------------------------------------------------------------------------------------------------------------------------------------------------------------|
| Training and Guidelines          | <ul style="list-style-type: none"> <li>• Training on antibiotic use in formal and informal settings, messaging through posters, flyers, newsletters, or electronic communication to health care providers/service providers, e.g. training on antibiotic use, internet-based training</li> <li>• Educating prescribers, pharmacists, and nurses about adverse reactions from antibiotics, antibiotic resistance, and optimal prescribing e.g. interactive workshop and educational seminar</li> <li>• Developing or updating guideline and protocol about appropriate antibiotic use e.g. develop community-acquired pneumonia guidelines for hospitalists.</li> </ul> |
| Decision support tools           | <ul style="list-style-type: none"> <li>• Decision support through electronic or paper-based strategies for antibiotic use e.g. electronic-based treatment algorithm or a poster with a clinical algorithm</li> </ul>                                                                                                                                                                                                                                                                                                                                                                                                                                                   |
| Antibiotic restriction           | <ul style="list-style-type: none"> <li>• Restricting antibiotic use by interventions, such as preauthorization, requires prescribers to gain approval before using certain antibiotics. e.g. preauthorization through an electronic order entry system or ID physician.</li> </ul>                                                                                                                                                                                                                                                                                                                                                                                     |
| Prospective audit and feedback   | <ul style="list-style-type: none"> <li>• An external review of antibiotic therapy by antibiotic experts (usually physicians and/or pharmacists), e.g. case-by-case review of patients prescribed antibiotics by an infectious diseases (ID) physician.</li> </ul>                                                                                                                                                                                                                                                                                                                                                                                                      |
| Tracking                         | <ul style="list-style-type: none"> <li>• Monitoring and evaluation of antibiotic prescribing and other vital outcomes (antibiotic prescribing and outcome tracking systems) and reporting prescription practices, infection and resistance patterns, e.g. monitoring <i>C. difficile</i> infection and resistance patterns.</li> </ul>                                                                                                                                                                                                                                                                                                                                 |
| Pharmacy-based Interventions     | <ul style="list-style-type: none"> <li>• The engagement of pharmacists in ASPs to improve antibiotic use. The pharmacist's role in ASPs is to document antibiotic indications, dosage adjustment, and duplicative antibiotic therapy alerts and to monitor antibiotic-related drug interactions and adverse effects e.g. clinical pharmacist provides a notification to switch antibiotic therapy.</li> </ul>                                                                                                                                                                                                                                                          |
| Microbiology-based interventions | <ul style="list-style-type: none"> <li>• Antimicrobial susceptibility testing results to show antibiotics that are in line with hospital/clinical treatment guidelines or ASPs and to help providers in clinical decision making with microbiology report e.g. antibiotic culture and sensitivity test report.</li> </ul>                                                                                                                                                                                                                                                                                                                                              |

eFigure 1. Change in Total Antibiotic Consumption after ASPs (DDD or DOT per 100 Patient-Days)

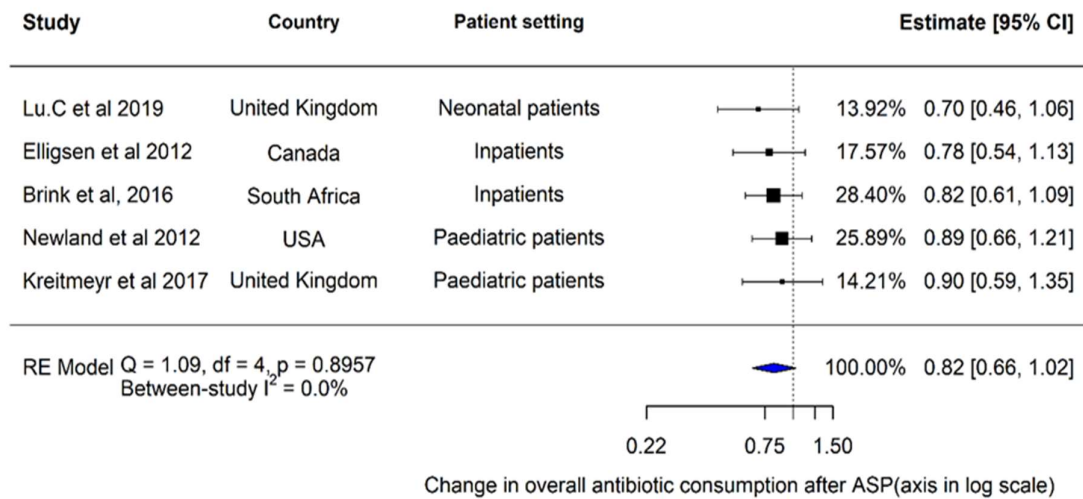

Figure 1 shows the average change in antibiotic consumption post- compared to pre-intervention. RR:rate ratio. The rate ratio (RR) of antibiotic consumption was obtained by dividing the post-intervention consumption rate measured in DDD or DOT per 100 PD by the pre-intervention consumption rate. A rate ratio below the value of 1 indicates that ASPs are associated with a reduction of (1-RR)% in antibiotic consumption. Numbers quoted in percentage terms are the weights assigned to each effect size by the three-level random effects model. 95% confidence intervals are included in brackets. No significant reduction in consumption was measured among studies that reported consumption pooled across antibiotics (RR=0.82, 95% CI [0.66 to 1.02]; 5 estimates).

eFigure 2. Subgroup Analyses (Antibiotic Prescriptions)

A Forest plot of included studies stratified by patient settings (Antibiotic prescriptions)

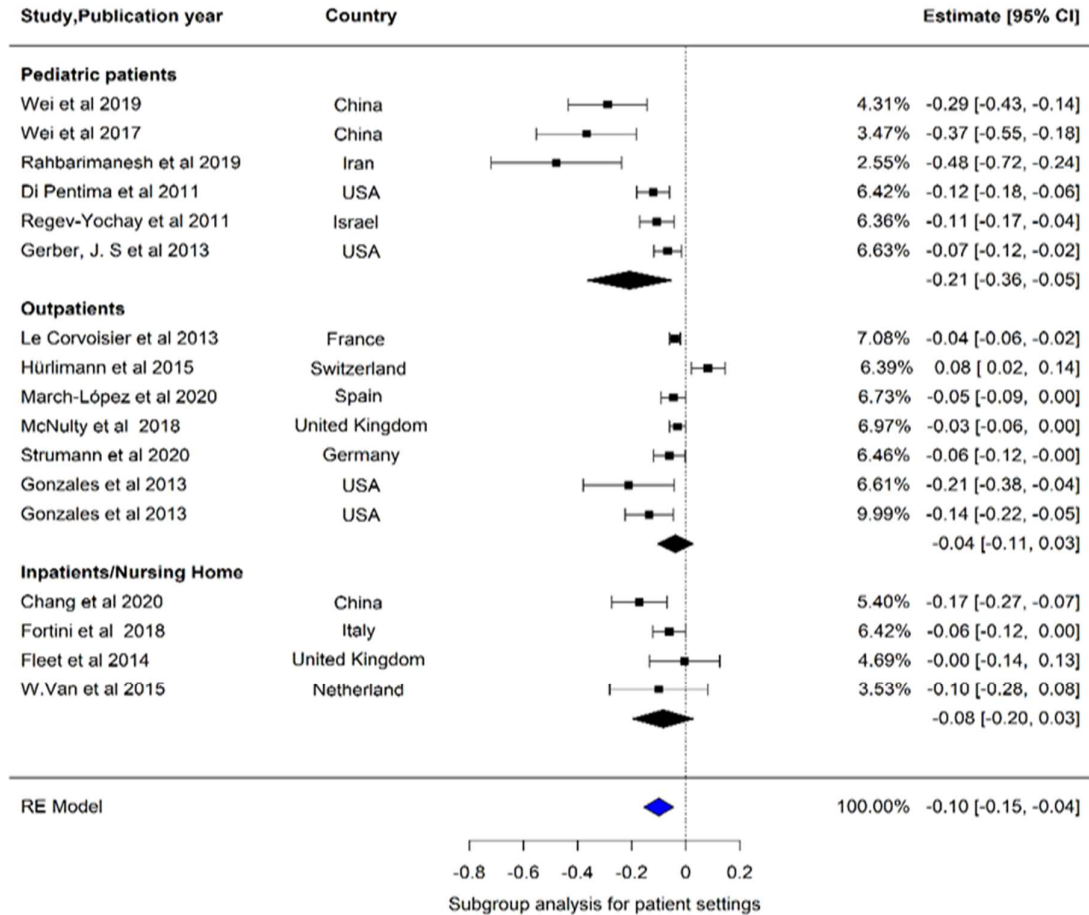

Figure 2a shows the stratified results for the average change in the proportion of patients receiving an antibiotic prescription in the post-intervention compared to the pre-intervention period. This was calculated as the proportion of all patients that received an antibiotic prescription post-intervention minus the same proportion measured in the pre-intervention period. For randomised controlled trials, pre-intervention differences in the proportion of prescriptions between treatment and control groups were subtracted from post-intervention differences. A negative effect size indicates that ASPs are associated with a reduction in antibiotic prescriptions of magnitude equal to the value of the effect size itself. Numbers quoted in percentage terms are the weights assigned to each effect size by the three-level random effects model. 95% confidence intervals are included in brackets.

B: Forest plot of included studies stratified by income classification (Antibiotic prescriptions)

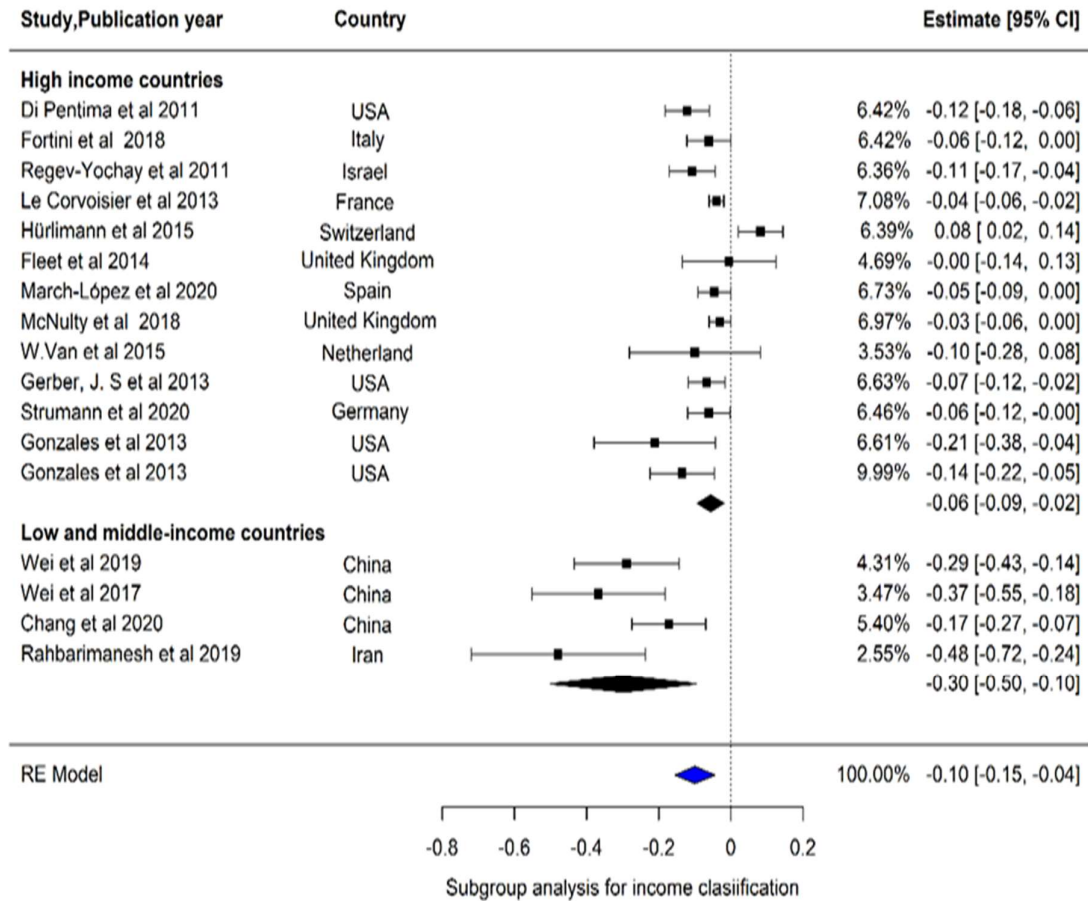

Figure 2b shows the stratified results for the average change in the proportion of patients receiving an antibiotic prescription in the post-intervention compared to the pre-intervention period. This was calculated as the proportion of all patients that received an antibiotic prescription post-intervention minus the same proportion measured in the pre-intervention period. For randomised controlled trials, pre-intervention differences in the proportion of prescriptions between treatment and control groups were subtracted from post-intervention differences. A negative effect size indicates that ASPs are associated with a reduction in antibiotic prescriptions of magnitude equal to the value of the effect size itself. Numbers quoted in percentage terms are the weights assigned to each effect size by the three-level random effects model. 95% confidence intervals are included in brackets.

C: Forest plot of included studies stratified by study settings (Antibiotic prescriptions)

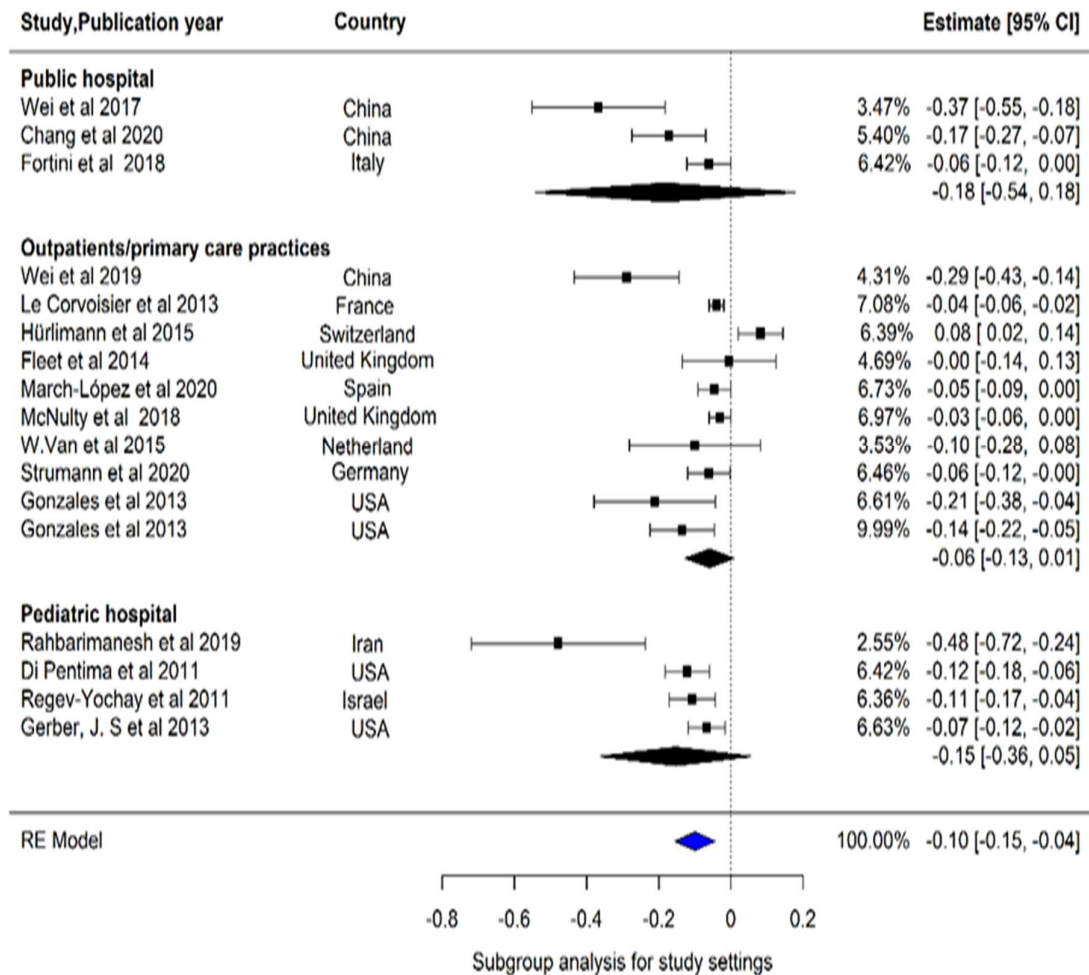

Figure 2c shows the stratified results for the average change in the proportion of patients receiving an antibiotic prescription in the post-intervention compared to the pre-intervention period. This was calculated as the proportion of all patients that received an antibiotic prescription post-intervention minus the same proportion measured in the pre-intervention period. For randomised controlled trials, pre-intervention differences in the proportion of prescriptions between treatment and control groups were subtracted from post-intervention differences. A negative effect size indicates that ASPs are associated with a reduction in antibiotic prescriptions of magnitude equal to the value of the effect size itself. Numbers quoted in percentage terms are the weights assigned to each effect size by the three-level random effects model. 95% confidence intervals are included in brackets.

D: Forest plot of included studies stratified by intervention types (Antibiotic prescriptions)

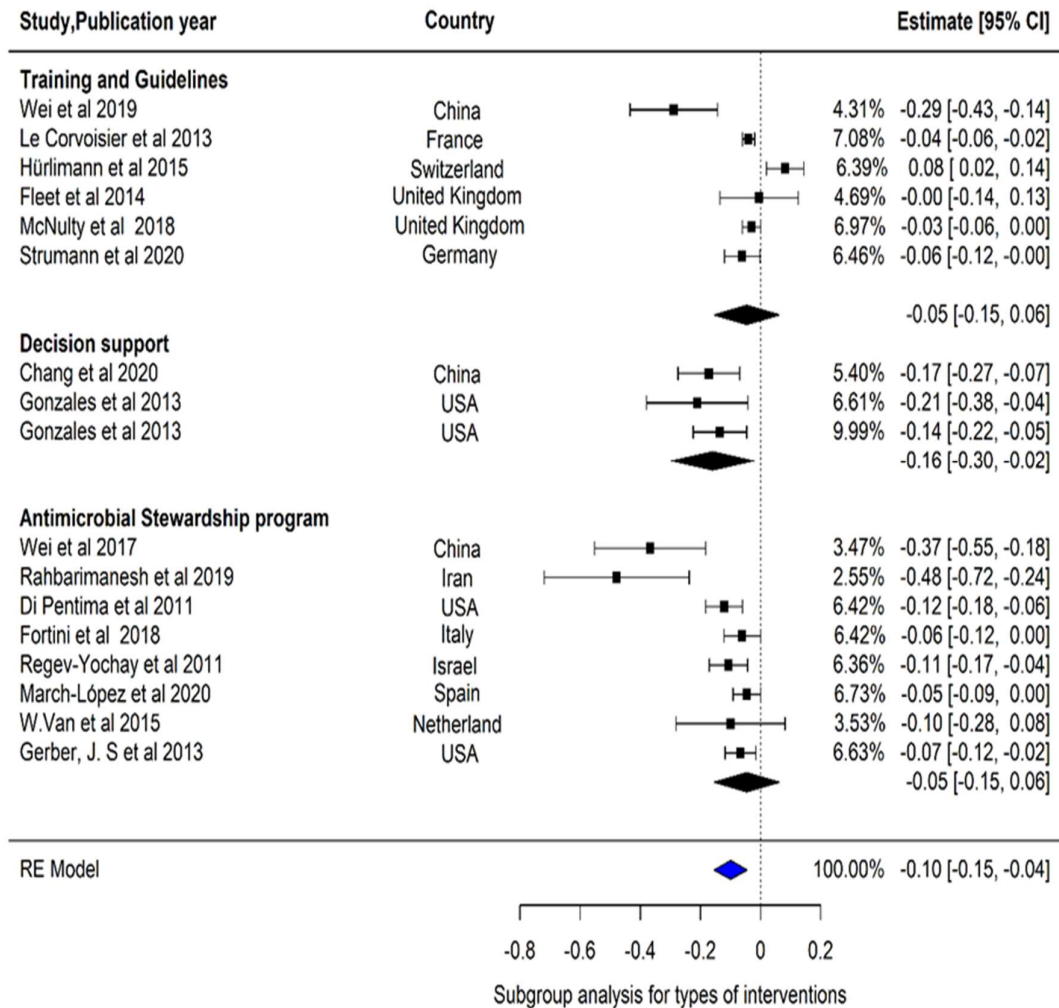

Figure 2d shows the stratified results for the average change in the proportion of patients receiving an antibiotic prescription in the post-intervention compared to the pre-intervention period. This was calculated as the proportion of all patients that received an antibiotic prescription post-intervention minus the same proportion measured in the pre-intervention period. For randomised controlled trials, pre-intervention differences in the proportion of prescriptions between treatment and control groups were subtracted from post-intervention differences. A negative effect size indicates that ASPs are associated with a reduction in antibiotic prescriptions of magnitude equal to the value of the effect size itself. Numbers quoted in percentage terms are the weights assigned to each effect size by the three-level random effects model. 95% confidence intervals are included in brackets. (Antimicrobial Stewardship program= multi-component ASPs)



eFigure 3. Subgroup Analyses (Consumption in DDD per 100 Patient-Days)

A. Forest plot of included studies stratified by patient settings (Antibiotic consumption in DDD per 100 patient days)

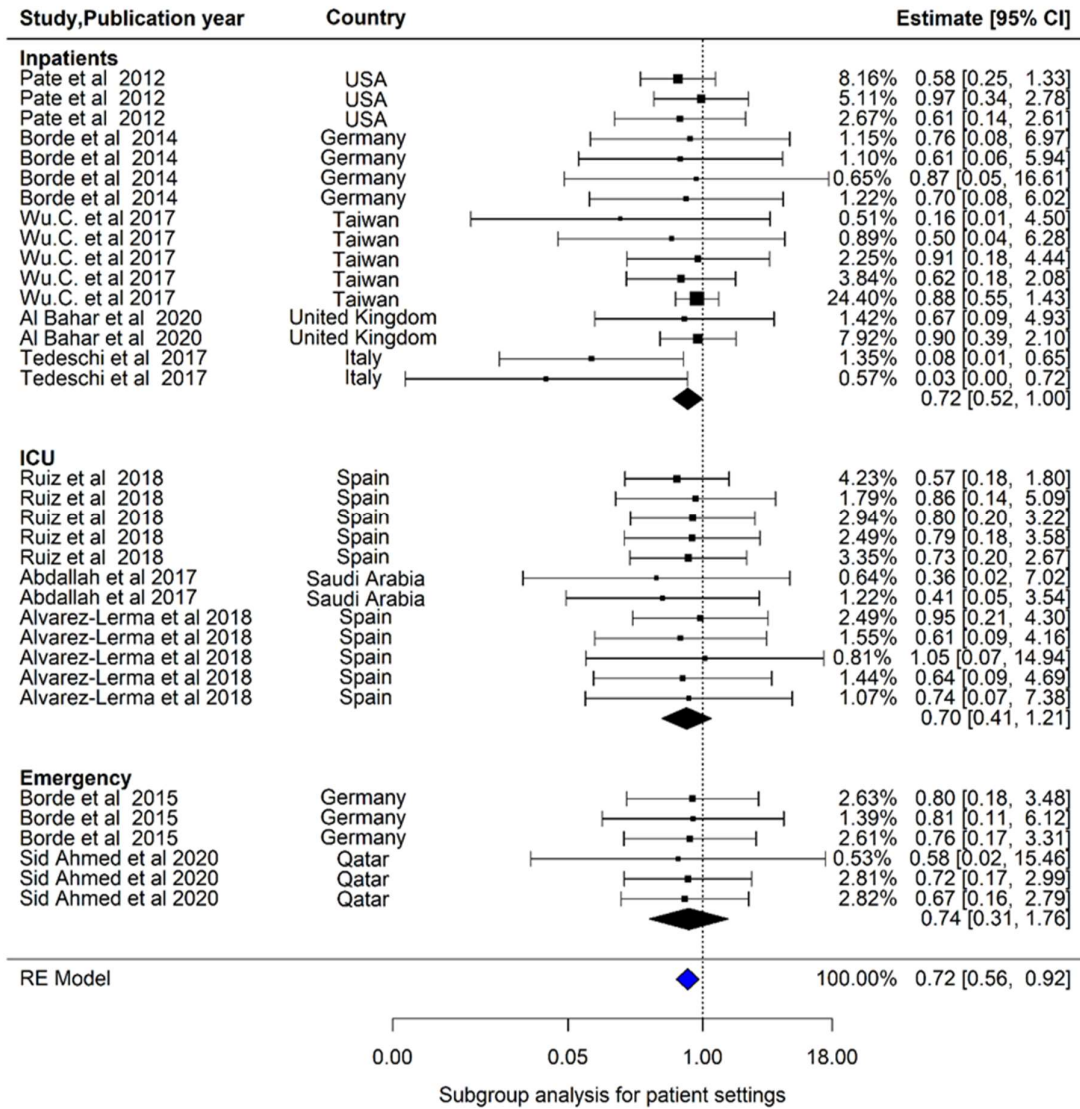

Figure 3a shows the stratified results for the average change in antibiotic consumption post- compared to pre-intervention. RR:rate ratio. The rate ratio (RR) of antibiotic consumption was obtained by dividing the post-intervention consumption rate measured in DDD per 100 PD by the pre-intervention consumption rate. A rate ratio below the value of 1 indicates that ASPs are associated with a reduction of (1-RR) % in antibiotic consumption. Numbers quoted in percentage terms are the weights assigned to each effect size by the three-level random effects model. 95% confidence intervals are included in brackets. (ICU= Patients in intensive care unit, Emergency = Patients in acute care hospital).

B. Forest plot of included studies stratified by antibiotic restriction as per individual protocol settings (Antibiotic consumption in DDD per 100 patient days)

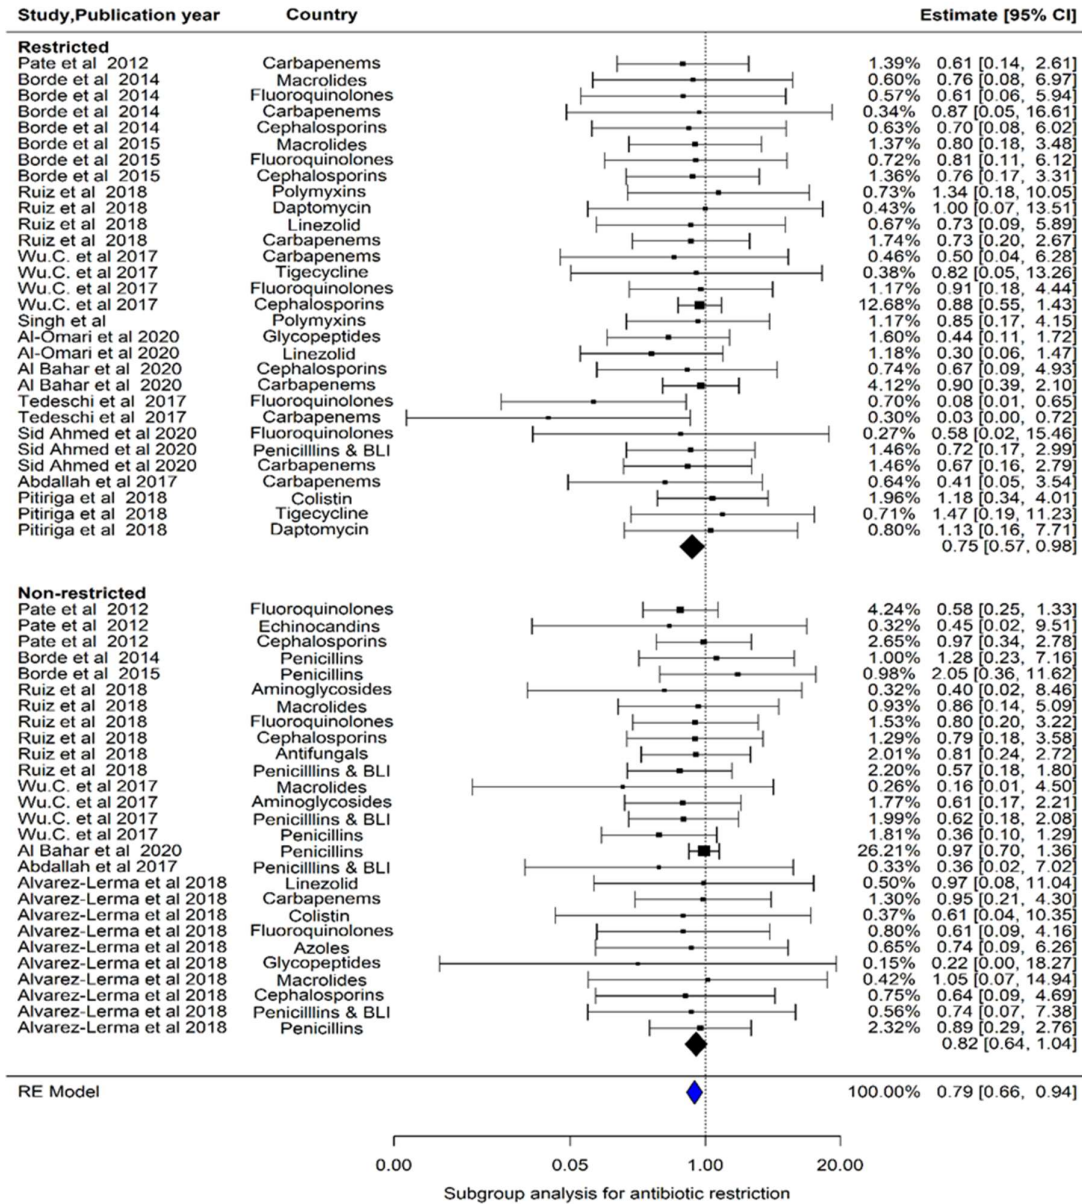

Figure 3b shows the stratified results for the average change in antibiotic consumption post- compared to pre-intervention. RR:rate ratio. The rate ratio (RR) of antibiotic consumption was obtained by dividing the post-intervention consumption rate measured in DDD per 100 PD by the pre-intervention consumption rate. A rate ratio below the value of 1 indicates that ASPs are associated with a reduction of (1-RR) % in antibiotic consumption. Numbers quoted in percentage terms are the weights assigned to each effect size by the three-level random effects model. 95% confidence intervals are included in brackets. Non-restricted= No restriction on antibiotic as per individual protocol).

eFigure 4. Meta-analysis Summary (Antibiotic Consumption in DDD per 100 Patient-Days)

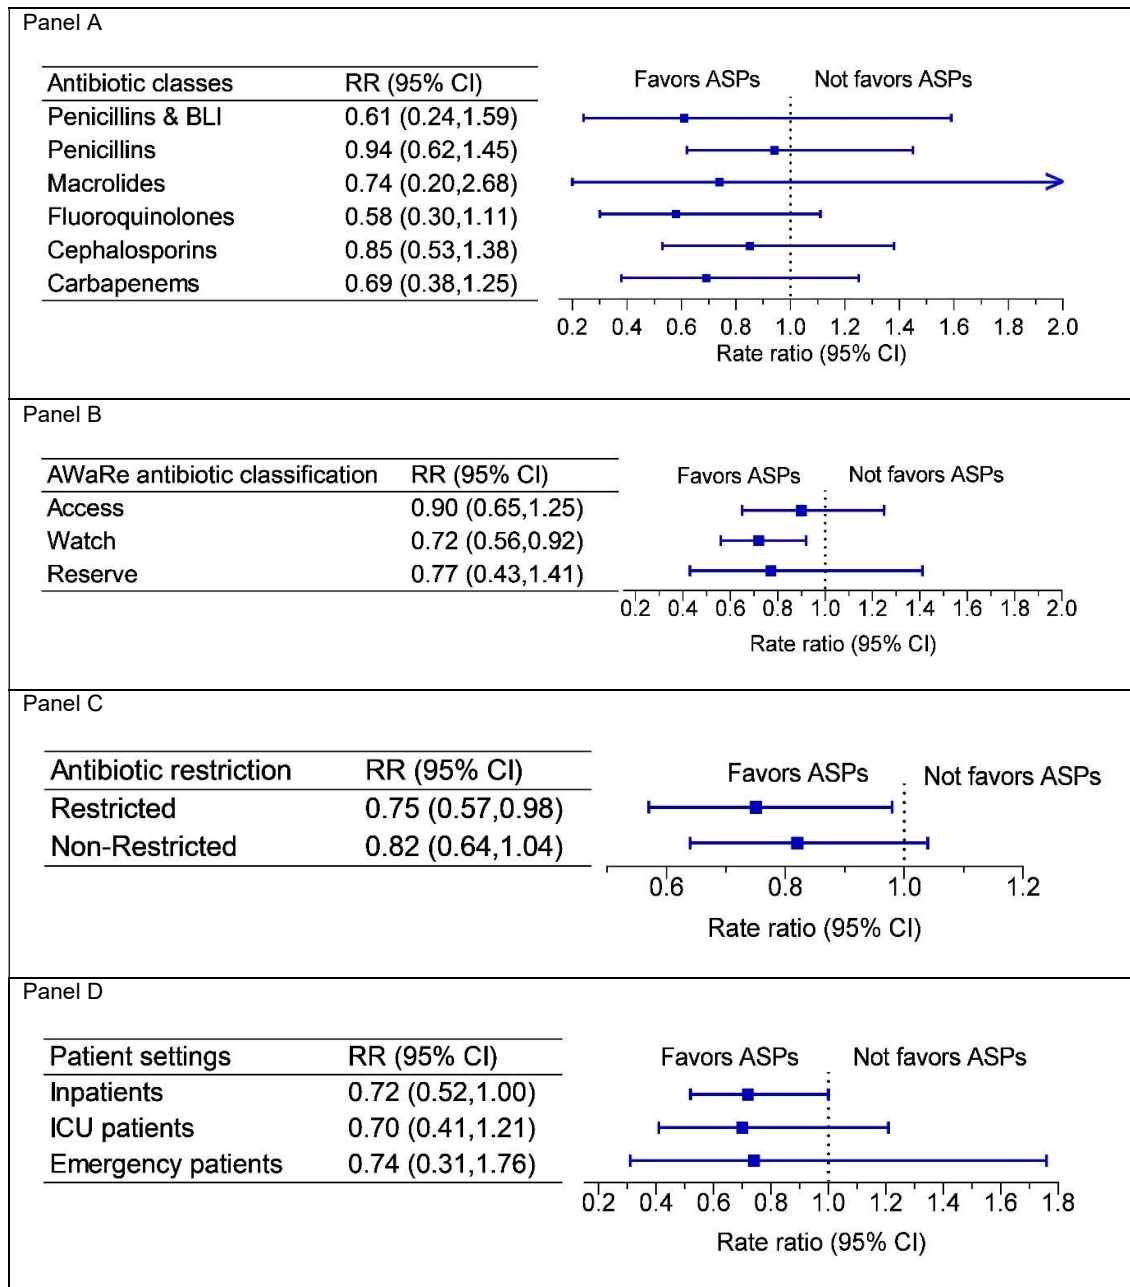

Figure 4 5 summarizes stratified results for the change in antibiotic consumption after ASPs in post- to the pre-intervention period. RR:rate ratio. The rate ratio (RR) of antibiotic consumption was obtained by dividing the post-intervention consumption rate measured in DDD per 100 PD by the pre-intervention consumption rate. A rate ratio below the value of 1 indicates that ASPs are associated with a reduction of (1-RR) % in antibiotic consumption. Error bars represents 95% CI and the size of each square represents the pooled effect size. Panel A: Stratified result by antibiotic classes, Panel B: Stratified result by AWaRe WHO antibiotic classification, Panel C: Stratified result by antibiotic restriction, Panel D: Stratified result by patient settings
