# Supplementary material for: Association Between Antimicrobial Stewardship Programs and Antibiotic Use Globally: A Systematic Review and Meta-Analysis
Source: PubMed Central journal article supplement (PMC9912134; doi:10.1001/jamanetworkopen.2022.53806), 2023-02-09
Supplement: jamanetwopen-e2253806-s002.pdf [file jamanetwopen-e2253806-s002.pdf]

## Data Sharing Statement

Zay Ya. Association Between Antimicrobial Stewardship Programs and Antibiotic Use Globally. *JAMA Netw Open*. Published February 09, 2023. doi:10.1001/jamanetworkopen.2022.53806

### Data

**Data available:** Yes

**Data types:** Data dictionary, Other (please specify)

**Additional Information:** Supplementary materials

**How to access data:** All data and figures relevant to this systematic review and meta-analysis paper can be seen in the article or supplementary materials.

**When available:** With publication

### Supporting Documents

**Document types:** None

### Additional Information

**Who can access the data:** All data and figures relevant to this systematic review and meta-analysis paper can be seen in the article or supplementary materials.

**Types of analyses:** for any purpose

**Mechanisms of data availability:** without investigator support
